# Supplementary material
Source: PubMed Central journal article supplement (PMC7291369)

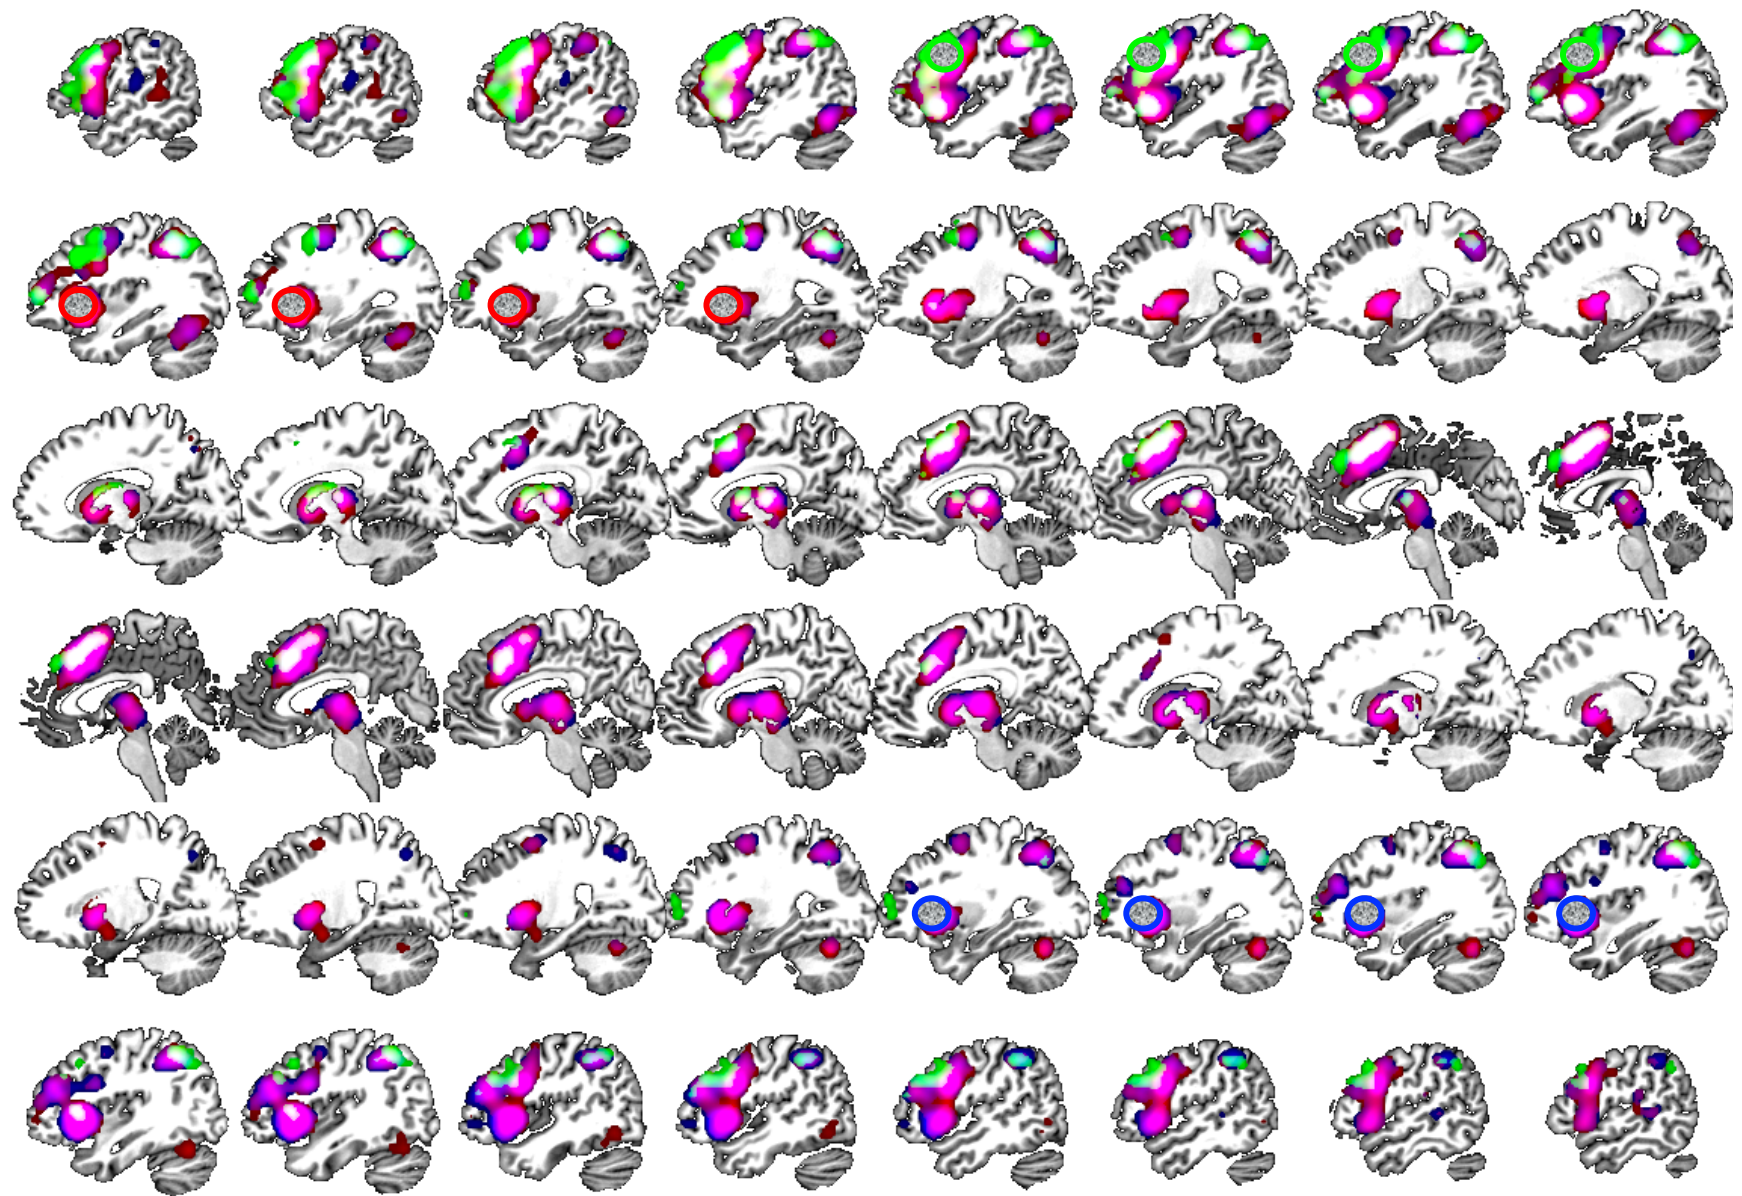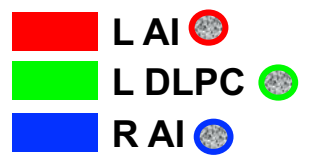

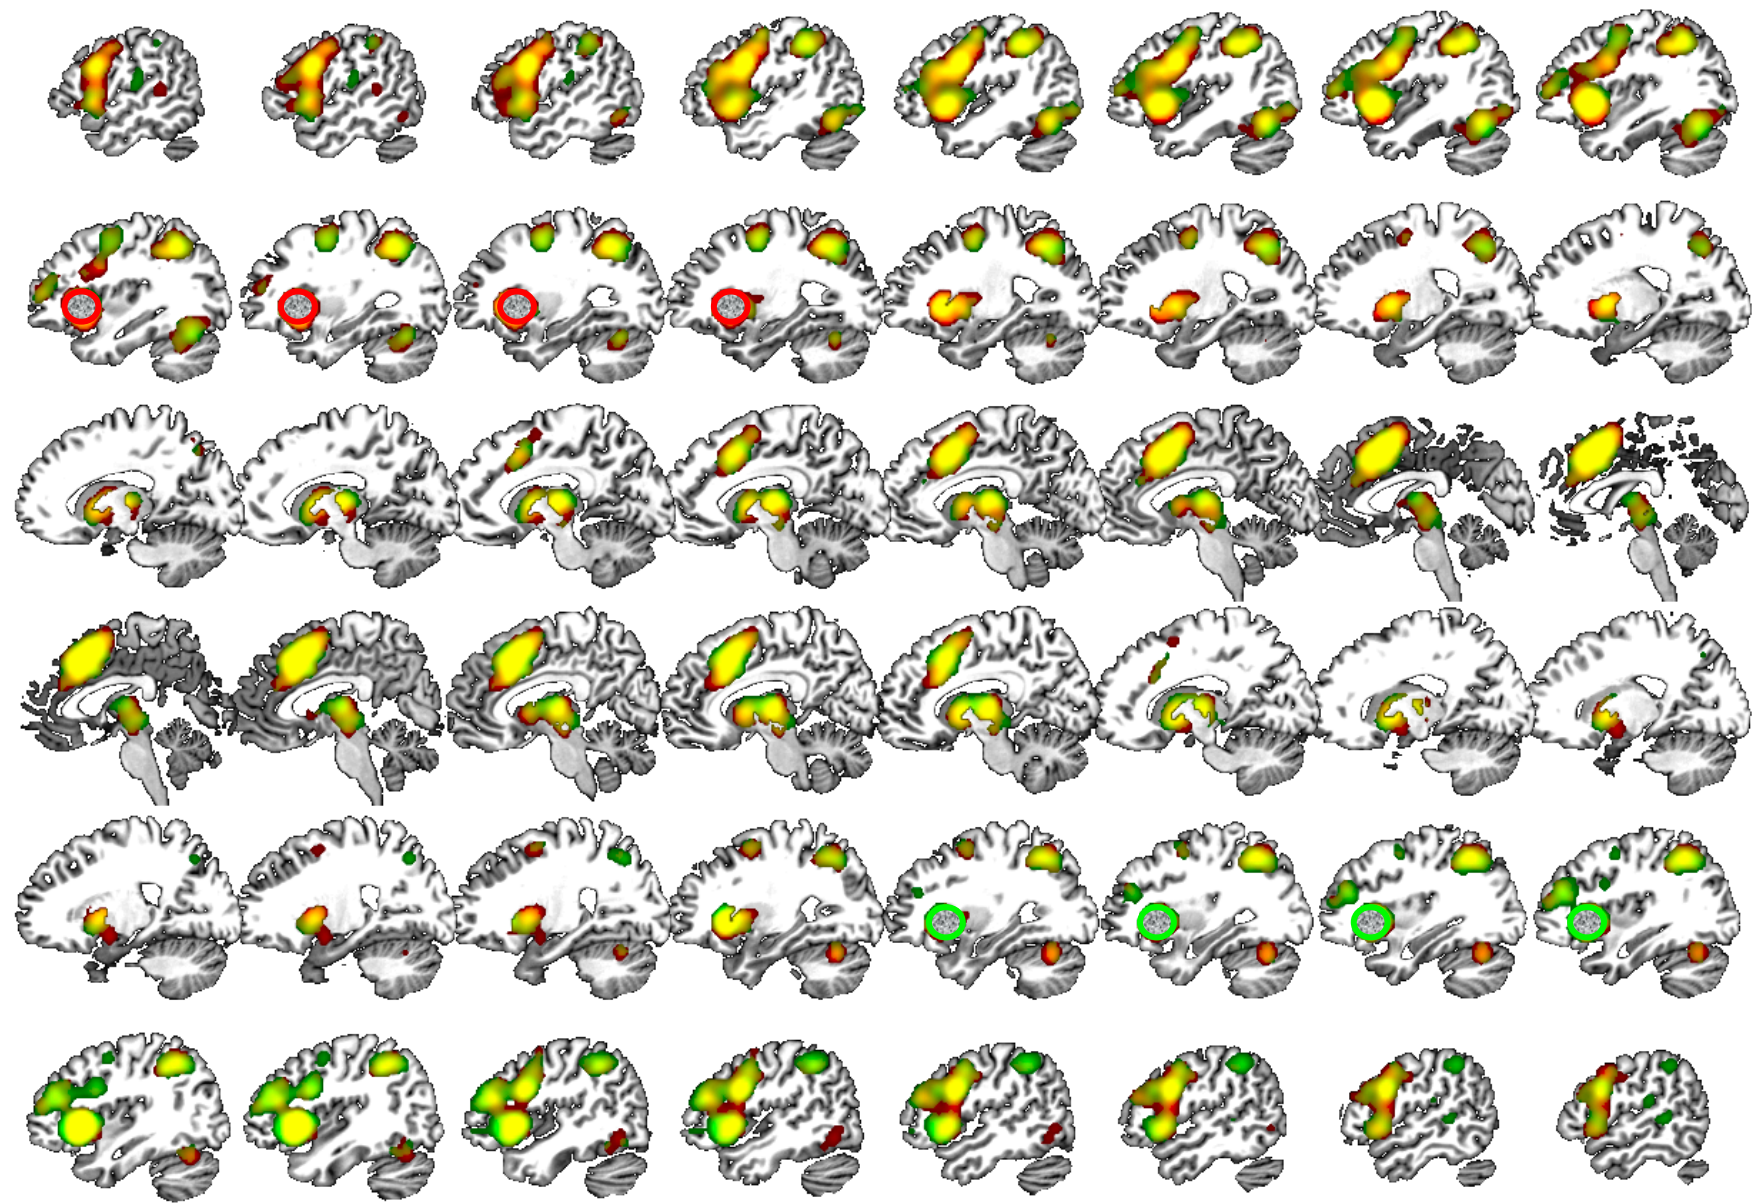

■ LAI ○  
■ RAI ○



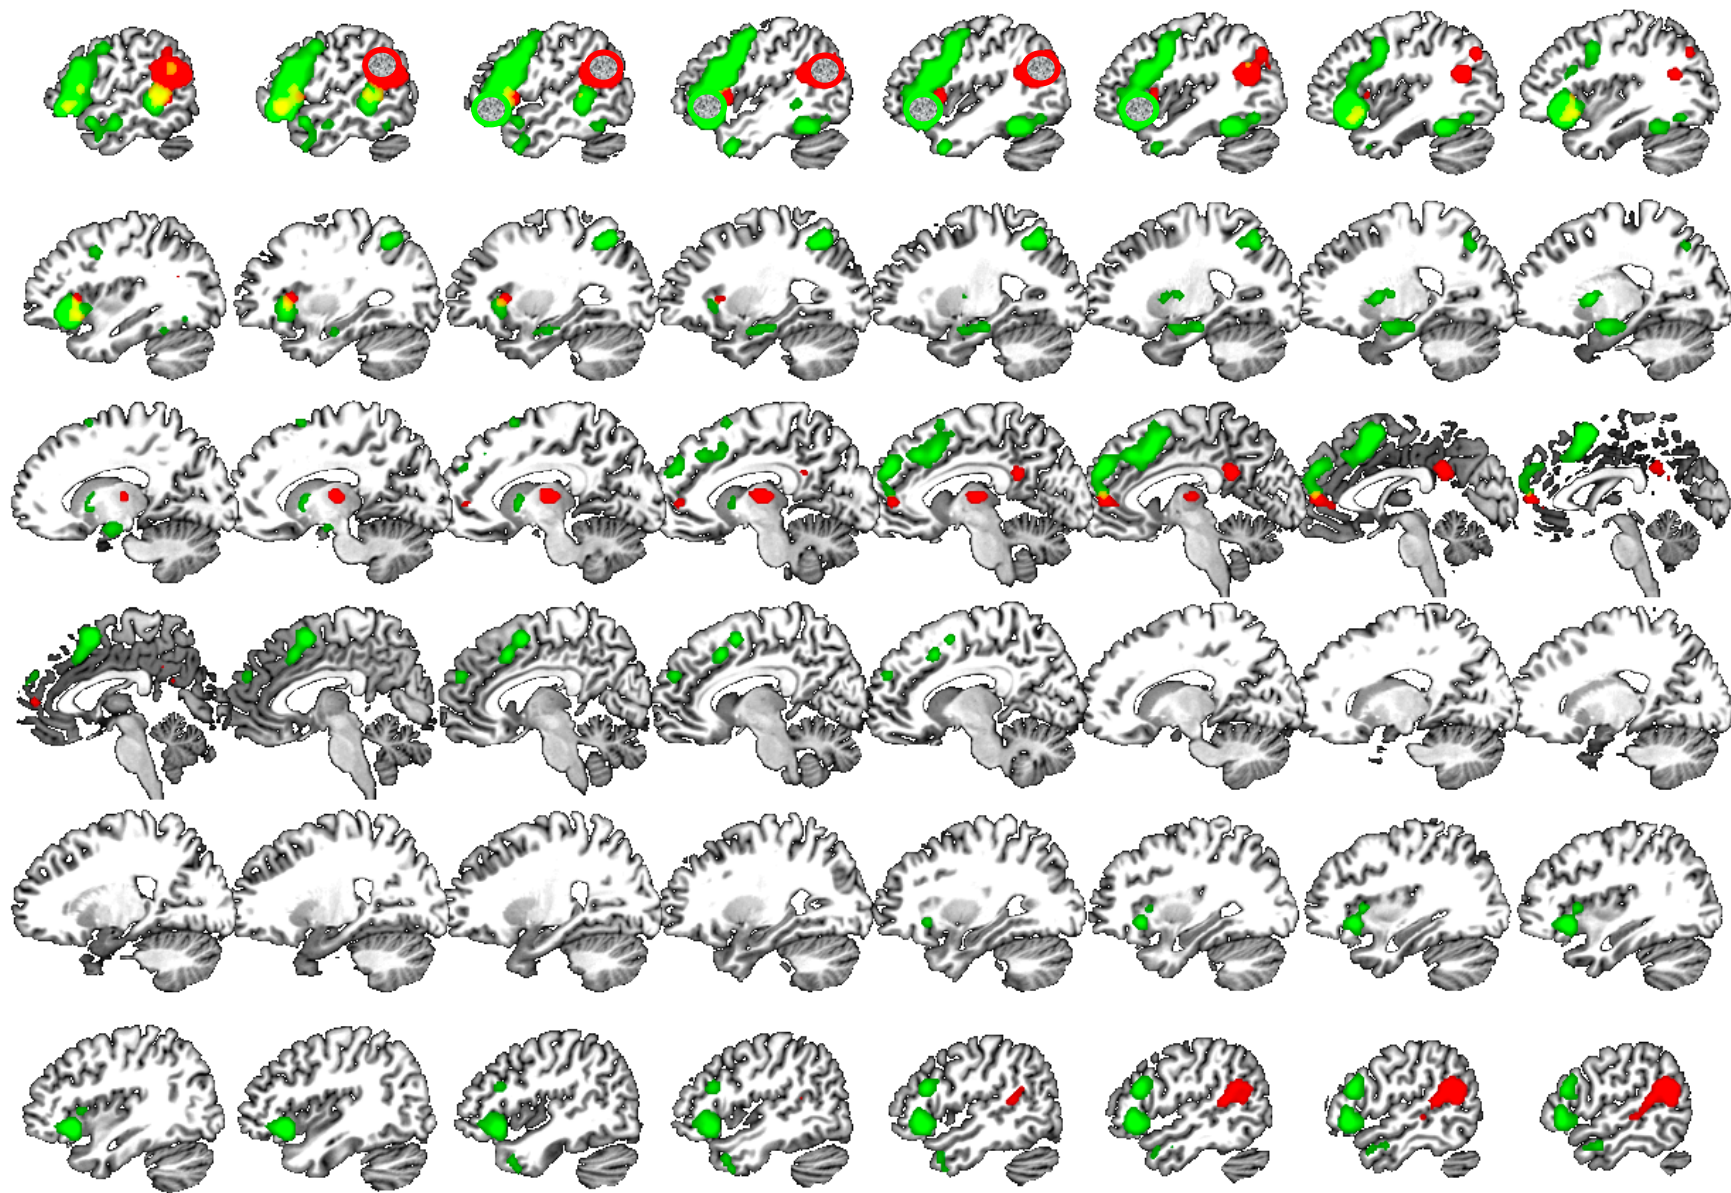

**■** L pTPJ    **●**  
**■** L VLPFC    **●**

Supplement: NIHMS1588551-supplement-5.pdf [file NIHMS1588551-supplement-5.pdf]
